# Supplementary material
Source: PubMed Central journal article supplement (PMC3947048)
Supplement: NIHMS513915-supplement-Supp_Table_S1.pdf [file NIHMS513915-supplement-Supp_Table_S1.pdf]

Supplemental Table 1: Nonsynonymous Coding SNPs in Congenic Region

| Chr. | Genome Coordinates (strand) | Gene Name                                                                 | Gene Symbol | # of SNPs |
|------|-----------------------------|---------------------------------------------------------------------------|-------------|-----------|
| 10   | 128254131-128255901 (+)     | apolipoprotein N                                                          | Apon        | 1         |
| 10   | 127323727-127329943 (+)     | Rho GTPase activating protein 9                                           | Arhgap9     | 1         |
| 10   | 127866474-127877317 (+)     | cDNA sequence BC089597                                                    | BC089597    | 2         |
| 10   | 128337832-128362479 (+)     | citrate synthase                                                          | Cs          | 1         |
| 10   | 127329882-127341579 (-)     | GLI-Kruppel family member GLI1                                            | Gli1        | 2         |
| 10   | 128194457-128210004 (+)     | glutaminase 2 (liver, mitochondrial)                                      | Gls2        | 2         |
| 10   | 125966219-126015359 (+)     | leucine-rich repeats and immunoglobulin-like domains 3                    | Lrig3       | 2         |
| 10   | 127538161-127621148 (-)     | low density lipoprotein receptor-related protein 1                        | Lrp1        | 1         |
| 10   | 127281956-127289018 (-)     | methyl-CpG binding domain protein 6                                       | Mbd6        | 1         |
| 10   | 128303335-128321358 (+)     | PAN2 polyA specific ribonuclease subunit homolog ( <i>S. cerevisiae</i> ) | Pan2        | 1         |
| 10   | 127517123-127522444 (-)     | serine hydroxymethyltransferase 2 (mitochondrial)                         | Shmt2       | 2         |
| 10   | 128270576-128292849 (+)     | signal transducer and activator of transcription 2                        | Stat2       | 3         |
| 10   | 127666901-127701049 (+)     | transmembrane protein 194                                                 | Tmem194     | 1         |
| 10   | 127739538-127747335 (+)     | zinc finger and BTB domain containing 39                                  | Zbtb39      | 2         |
